# Supplementary material
Source: publisher site journal article supplement (https://www.dovepress.com/article/469538)
Supplement: Supplementary file 1 [file get_supplementary_file.php]

# **Supplementary Material: The Western Denmark Myocardial Perfusion Imaging Registry: a Review and Validation Study**

**Supplementary Table 1** Codes for Assessing Completeness of Procedure Registration

| **SKS code description** | **SKS code** |
| --- | --- |
| Myocardial perfusion, [13N]NH3 PET | WHBPDN* |
| Myocardial perfusion, [15O]H2O PET | WHBPDO2* |
| Myocardial perfusion, Rubidium-82 PET | WHBPDR* |
| Myocardial perfusion scintigraphy, Tc-99m-sestamibi SPECT | WHBSG20*, WHBSS20* |
| Myocardial perfusion scintigraphy, Tc-99m-tetrofosmin SPECT | WHBSG21*,  WHBSS21* |
| Myocardial perfusion scintigraphy, Tl-201-chlorid SPECT | WHBSGT*,  WHBSST* |
| Myocardial perfusion scintigraphy, Tc-99m SPECT | WHBSS9* |

Legend: SKS (The Danish Medical Classification System) codes for myocardial perfusion imaging procedures in Danish National Patient Registry used for assessment of completeness of procedure registrations in the Western Denmark Myocardial Perfusion Imaging Registry.

Notes: *denotes that procedures with any following letters or numbers are included.

**Abbreviations:** PET, positron emission tomography; SKS, Sundhedsvæsenets klassifikations system, English: The Danish Medical Classification System; SPECT, single-photon emission computed tomography.

**Supplementary Table 2** Variables, Variable Values and Reference Standards for Validation of Data in the Myocardial Perfusion Imaging Subregistry of the Western Denmark Heart Registry

| **Variable validated** | **Values (reference standards for validation)** |
| --- | --- |
| **Medical history** | |
| Family history of premature coronary artery disease | Yes/no/missing |
| Smoking status | Current/former/never/missing |
| Diabetes | Insulin dependent/non-insulin-dependent/non-pharmacological treatment/newly diagnosed elevated blood glucose/no/missing |
| Medically treated dyslipidemia | Yes/no/missing |
| Medically treated hypertension | Yes/no/missing |
| Previous myocardial infarction | Yes/no/missing |
| Previous percutaneous coronary intervention | Yes/no/missing |
| Ejection fraction on echocardiography | Exact value |
| **Procedure** | |
| Date of procedure | Year-month-date (± 7 days) |
| Indication | Angina or angina equivalent/ischemia evaluation/asymptomatic electrocardiogram changes/heart failure/other inconclusive diagnostic cardiac procedure/anomalous coronary artery/microvascular disease/research/transplant evaluation/other clinical indication/missing |
| Imaging modality | PET/SPECT/missing |
| SPECT tracera | Sestamibi/tetrofosmin/other/missing |
| PET tracerb | Rubidium-82/[13N]NH3 /[15O]H2O /F-isotope/other/missing |
| Stress protocol | Ergometer/adenosine/regadenoson/dobutamine/other/missing |
| Any complication | Yes/no/missing |
| Complicationc | AV block/arrhythmia/bronchospasm/vasovagal reaction/other/missing |
| **Results** | |
| Image quality | Evaluable/partially evaluable/not evaluable/missing |
| Any abnormal perfusion | Yes/no/missing |
| Perfusion abnormalityd | Reversible ischemia >10% of myocardium/irreversible ischemia/irreversible ischemia and reversible ischemia >10% of myocardium/reversible ischemia <10% of myocardium/irreversible ischemia and reversible ischemia <10% of myocardium/balanced ischemia/other/missing |
| Ejection fraction stress | Exact value |
| Left ventricular end-diastolic volume stress | Exact value in mL |
| Left ventricular mean volume stress | Exact value in mL |
| Stress flow LAD | Exact value in mL/g/min |
| Myocardial flow reserve LAD | Exact value |
| Stress score segment 13 | Exact score 0–4 |
| Summed stress score | Exact score 0–68 |

Notes: aOnly in SPECT procedures, bOnly in PET procedures, cOnly in procedures with any complication, dOnly in procedures with any abnormal perfusion.

**Abbreviations:** LAD, left anterior descending artery; PET, positron emission tomography; SPECT, single-photon emission computerized tomography.
